# Supplementary material for: Development of an Evaluation Index System for Job Competency of Chinese Clinical Teachers: A Delphi Method Study
Source: Research Square preprint supplement (doi:10.21203/rs.3.rs-8093909/v1), 2026-01-21
Supplement: Supplementary file 1 [file 3bf2735b83897e762280cb4a.docx]

**Additional file 1**

**Development of an Evaluation Index System for Job Competency of Chinese Clinical Teachers: A Delphi Method Study**

**Questionnaire on Job Competency of Clinical Teachers**

**Dear Experts,**

We sincerely appreciate your willingness to serve as a consulting expert for this research project!This research project is conducting an investigation on the "Evaluation Index System for Job Competency of Clinical Practice Teachers". It aims to construct a scientific evaluation index system for the job competency of clinical practice teachers through rigorous methodologies, clarify the competency requirements for teachers to successfully fulfill internship teaching tasks at a high quality, and provide a scientific basis for the selection, training, and assessment of clinical practice teachers.Based on preliminary literature research, existing relevant research tools, and expert interviews, a preliminary framework has been established, comprising 4 first-level indicators, 9 second-level indicators, and 48 third-level indicators. However, further guidance from all experts is still needed regarding the comprehensiveness of indicator coverage and the importance of indicator content.

Given your profound academic attainments in this field, extensive experience in clinical practice teaching, hospital teaching management, and other related work, as well as your rich medical education expertise, we sincerely hope to obtain your guidance and assistance. Your opinions will serve as an important basis for our research!

This expert consultation questionnaire consists of two parts: Part One is the Basic Information Survey of Consulting Experts; Part Two is the Consultation Form for Evaluation Index Determination. The information you provide will be strictly confidential and used solely for this research.

We sincerely appreciate your support and guidance! We wish you every success in your work and good health!

If you have any questions or inquiries regarding the questionnaire, please feel free to contact us at any time.

Contact Person: Jinxin

KeTel: +86 19011304379

Email: [1340756235@qq.com](mailto:1340756235@qq.com)

**Delphi s’ first cycle questionnaire**

**Part One: Basic Information Questionnaire for Consulting Experts**

1.This questionnaire aims to collect information about your personal background. The data will be used exclusively for statistical analysis, treated with strict confidentiality, and will not be utilized for any other purposes whatsoever. Please complete the questionnaire based on your actual situation or mark the appropriate options with a "√". If further explanations are required, please note them in the corresponding columns.

| Name |  | | Gender | □Male  □Female | Age |  |
| --- | --- | --- | --- | --- | --- | --- |
| Highest Educational Qualification | □Doctorate  □Master’s Degree  □Bachelor’s Degree  □College Diploma  □Others：____ | | Research Field |  | Years of Professional Experience |  |
| Position | □Department Director  □Deputy Department Director  □Teaching and Research Section Director  □Deputy Teaching and Research Section Director  □Teaching and Research Section Secretary  □Ward Director  □Treatment Team Leader  □Deputy Ward Director  □Others： | | | | Professional Title | □Senior Grade  □Associate Senior Grade  □Intermediate Grade |
| Work Unit |  | | | | | |
| Contact Information |  | | | Email Address |  | |
| ID Card Number | |  | | Mobile Phone Number |  | |
| Bank Card Number | |  | | Bank Name |  | |

**Part Two: Consultation Form for Evaluation Index Determination**

Instructions for Completing the Questionnaire

**I. This section consists of 4 consultation forms, including:**

Form 1: Consultation Form for First-level Indicators

Form 2: Consultation Form for Second-level Indicators

Form 3: Consultation Form for Third-level Indicators

Form 4: Scoring Form for Judgement Basis, Influence Degree, and Familiarity with the Above Items

**II. Please rate the importance of each indicator based on your own experience and expertise.**

**Importance Rating:** Extremely Important = 5 points; Quite Important = 4 points; Moderately Important = 3 points; Less Important = 2 points; Unimportant = 1 point. Please assess the relative importance of each indicator and mark the corresponding option with a "√".

If you consider the indicator description to be inaccurate or deem the indicator should be deleted, please fill in the revised content or indicate "Delete" in the "Comments on Revision or Deletion" column. For any indicators you believe are missing and need to be added, please supplement them in the blank "Suggested Additional Items" column. Please also evaluate the importance of your revised or additional content in accordance with the aforementioned rating criteria—no blank or missing items are allowed.

**Table 1: Consultation Form for First-level indices**

**Note:** Importance Rating: Extremely Important = 5 points; Quite Important = 4 points; Moderately Important = 3 points; Less Important = 2 points; Unimportant = 1 point. If you have any suggested additional items, please fill them in the blank lines below and assess their importance in accordance with the aforementioned rating criteria.

| First-level indices | Importance Rating | | | | | Expert Opinions |
| --- | --- | --- | --- | --- | --- | --- |
| 5 | 4 | 3 | 2 | 1 | Comments on Revision or Deletion |
| 1Professional Competence |  |  |  |  |  |  |
| 2Teaching Competence |  |  |  |  |  |  |
| 3Professional Ethics and Awareness |  |  |  |  |  |  |
| 4Personal Attributes |  |  |  |  |  |  |
|  |  |  |  |  |  |  |
|  |  |  |  |  |  |  |

**Table 2: Consultation Form for Second-level indices**

**Note:** Importance Rating: Extremely Important = 5 points; Quite Important = 4 points; Moderately Important = 3 points; Less Important = 2 points; Unimportant = 1 point. If you have any suggested additional items, please fill them in the blank lines below and assess their importance in accordance with the aforementioned rating criteria.

| Second-level indices | Importance Rating | | | | | Expert Opinions |
| --- | --- | --- | --- | --- | --- | --- |
| 5 | 4 | 3 | 2 | 1 | Comments on Revision or Deletion |
| 1.1Professional Knowledge |  |  |  |  |  |  |
| 1.2Clinical Practice Skills |  |  |  |  |  |  |
|  |  |  |  |  |  |  |
|  |  |  |  |  |  |  |
| 2.1 Instructional Design and Methods |  |  |  |  |  |  |
| 2.2Teaching Supervision Capabilities |  |  |  |  |  |  |
| 2.3Instructional Assessment and Feedback |  |  |  |  |  |  |
|  |  |  |  |  |  |  |
| 3.1Professional Ethics |  |  |  |  |  |  |
| 3.2Professional Attitude |  |  |  |  |  |  |
|  |  |  |  |  |  |  |
|  |  |  |  |  |  |  |
| 4.1Interpersonal Communication |  |  |  |  |  |  |
| 4.2Self-Characteristics |  |  |  |  |  |  |
|  |  |  |  |  |  |  |
|  |  |  |  |  |  |  |

**Table 3: Consultation Form for Third-level indices**

**Note:** Importance Rating: Extremely Important = 5 points; Quite Important = 4 points; Moderately Important = 3 points; Less Important = 2 points; Unimportant = 1 point. If you have any suggested additional items, please fill them in the blank lines below, assess their importance in accordance with the aforementioned rating criteria, and provide the definitions of the Third-level indices.

| Third-level indices | Importance Rating | | | | | Expert Opinions |
| --- | --- | --- | --- | --- | --- | --- |
| 5 | 4 | 3 | 2 | 1 | Comments on Revision or Deletion |
| 1.1.1Possess fundamental medical theoretical knowledge. |  |  |  |  |  |  |
| 1.1.2Possess specialist medical knowledge and cutting-edge developments within the discipline. |  |  |  |  |  |  |
| 1.1.3Mastery of the pathogenesis, clinical manifestations, diagnosis, and prevention/treatment principles of common and prevalent diseases. |  |  |  |  |  |  |
| 1.1.4Mastery of fundamental pharmacology and rational medication principles. |  |  |  |  |  |  |
| 1.1.5Mastery of the progression patterns and prevention principles of common infectious diseases. |  |  |  |  |  |  |
| 1.1.6Possess the ability to resolve complex medical issues and emergency management capabilities. |  |  |  |  |  |  |
|  |  |  |  |  |  |  |
|  |  |  |  |  |  |  |
| 1.2.1Possess the ability to comprehensively, systematically and accurately collect patient histories and document medical records in accordance with established protocols. |  |  |  |  |  |  |
| 1.2.2Possess the ability to conduct physical and mental examinations in a systematic and standardised manner. |  |  |  |  |  |  |
| 1.2.3Possess the ability to diagnose and manage common and prevalent diseases in internal medicine, surgery, gynaecology, and paediatrics. |  |  |  |  |  |  |
| 1.2.4Possess the ability to diagnose, provide emergency treatment, and manage general emergencies. |  |  |  |  |  |  |
| 1.2.5Possess the ability to apply correct diagnostic and therapeutic thinking to make medical decisions |  |  |  |  |  |  |
| 1.2.6Possess the ability to use medical equipment in a standardised manner and master clinical professional skills. |  |  |  |  |  |  |
|  |  |  |  |  |  |  |
|  |  |  |  |  |  |  |
| 2.1.1Possess the ability to familiarise oneself with teaching syllabuses and formulate teaching plans scientifically. |  |  |  |  |  |  |
| 2.1.2Possess the ability to innovate teaching designs and allocate teaching time appropriately. |  |  |  |  |  |  |
| 2.1.3Possess the ability to collect and apply teaching case studies appropriately. |  |  |  |  |  |  |
| 2.1.4Possess the ability to effectively allocate course responsibilities and cultivate trainees' capacity for independent operation. |  |  |  |  |  |  |
| 2.1.5Possess the ability to select and employ appropriate teaching methodologies (including guided, problem-based, interactive approaches). |  |  |  |  |  |  |
|  |  |  |  |  |  |  |
|  |  |  |  |  |  |  |
| 2.2.1Possesses the practical teaching capability to integrate theoretical teaching with hands-on operations. |  |  |  |  |  |  |
| 2.2.2Possesses the ability to extrapolate knowledge and expand relevant clinical understanding. |  |  |  |  |  |  |
| 2.2.3Be adept at stimulating the classroom atmosphere and possess teaching interaction capabilities. |  |  |  |  |  |  |
| 2.2.4Be adept at posing heuristic questions and possess the ability to stimulate students' enthusiasm for learning. |  |  |  |  |  |  |
| 2.2.5Be adept at cultivating students' ability to resolve practical clinical issues. |  |  |  |  |  |  |
|  |  |  |  |  |  |  |
|  |  |  |  |  |  |  |
| 2.3.1Possesses the ability to evaluate students' application of knowledge and skills. |  |  |  |  |  |  |
| 2.3.2Possesses the ability to select and apply appropriate assessment tools (e.g., formative assessment, peer assessment). |  |  |  |  |  |  |
| 2.3.3Possesses the ability to accurately assess student characteristics and tailor teaching accordingly. |  |  |  |  |  |  |
| 2.3.4Possesses the ability to provide effective feedback and recommendations. |  |  |  |  |  |  |
| 2.3.5Possesses the ability to reflect on clinical teaching and improve teaching quality. |  |  |  |  |  |  |
|  |  |  |  |  |  |  |
|  |  |  |  |  |  |  |
| 3.1.1Possess the awareness of abiding by laws and disciplines, and practicing medicine with integrity and impartiality. |  |  |  |  |  |  |
| 3.1.2Possess the awareness of empathy and a patient-centred service approach. |  |  |  |  |  |  |
| 3.1.3Possess the spirit of dedication to medicine and professional commitment. |  |  |  |  |  |  |
| 3.1.4Possess the awareness of caring for students and passion for teaching. |  |  |  |  |  |  |
| 3.1.5Uphold medical ethics and respect patients' privacy and dignity. |  |  |  |  |  |  |
|  |  |  |  |  |  |  |
|  |  |  |  |  |  |  |
| 3.2.1Possesses a strong sense of responsibility. |  |  |  |  |  |  |
| 3.2.2Possesses a sense of exemplary conduct. |  |  |  |  |  |  |
| 3.2.3Possesses a sense of mission for lifelong learning. |  |  |  |  |  |  |
| 3.2.4Possesses a work style characterised by rigor and pragmatism. |  |  |  |  |  |  |
| 3.2.5Possess the ability to maintain good self-regulation and resilience under pressure. |  |  |  |  |  |  |
|  |  |  |  |  |  |  |
|  |  |  |  |  |  |  |
| 4.1.1Possess the ability to appropriately manage interpersonal relationships. |  |  |  |  |  |  |
| 4.1.2Possess the ability to effectively employ communication techniques. |  |  |  |  |  |  |
| 4.1.3Possess the ability to maintain harmonious and positive relationships with patients, students, and colleagues. |  |  |  |  |  |  |
| 4.1.4Possess the ability to listen attentively to the needs of patients and students. |  |  |  |  |  |  |
| 4.1.5Possess the ability to prevent and resolve conflicts between medical staff and patients. |  |  |  |  |  |  |
|  |  |  |  |  |  |  |
|  |  |  |  |  |  |  |
| 4.2.1Possesses critical thinking (applies logical reasoning and data analysis to resolve workplace issues). |  |  |  |  |  |  |
| 4.2.2Possesses approachability. |  |  |  |  |  |  |
| 4.2.3Possesses inclusiveness. |  |  |  |  |  |  |
| 4.2.4Possesses good patience and perseverance. |  |  |  |  |  |  |
| 4.2.5Possesses integrity in solitude (acts with heightened caution when unsupervised). |  |  |  |  |  |  |
| 4.2.6Possesses ambition for achievement (sets challenging work goals and strives towards them). |  |  |  |  |  |  |
|  |  |  |  |  |  |  |
|  |  |  |  |  |  |  |

**Table 4 Please select the basis for your judgements, degree of influence, and familiarity level regarding the above itemsTick "√" in the corresponding columns**

| Basis for Judgement | Degree of Influence | | | | |
| --- | --- | --- | --- | --- | --- |
| Large | Medium | | Small | |
| Theoretical Analysis |  |  | |  | |
| Practical Experience |  |  | |  | |
| References |  |  | |  | |
| Intuition |  |  | |  | |
| Your Familiarity with the Content of This Survey | | | | | |
| Familiarity Level | Highly Familiar | Relatively Familiar | Moderately Familiar | Somewhat Unfamiliar | Unfamiliar |
|  |  |  |  |  |

**Upon completion of the questionnaire, we would like to express our sincere gratitude again for your support and assistance with this research project!**

**Wish you a pleasant life and smooth work!**

**Delphi s’ second cycle questionnaire**

**Respected Experts,**

Hello! We sincerely appreciate your willingness to serve as a consulting expert for this research project.

We would like to express our gratitude again for your assistance with the first round of consultation. Based on the results and suggestions from the first round, we have revised and adjusted the indicators and developed the second round of expert consultation questionnaire, hoping to receive your guidance once more.

In accordance with the experts' suggestions from the first round, the first-level indicators remain unchanged. The second-level indicators have been revised as follows: "Professional Attributes" is renamed "Professional Awareness", "Self-Characteristics" is renamed "Personality Traits", and "Interpersonal Communication" is renamed "Communication Skills". Meanwhile, key revisions and adjustments have been made to the third-level indicators, as detailed in the table below.

This expert consultation questionnaire consists of two parts: Part 1 is the Consulting Expert Basic Information Questionnaire; Part 2 is the Evaluation Index Determination Consultation Questionnaire. The information you provide will be strictly confidential and used solely for this research.

We sincerely thank you for your support and guidance! Wish you every success in your work and good health!

If you have any questions about the questionnaire, please feel free to contact us.

Contact Person: Jinxin

KeTel: +86 19011304379

Email: [1340756235@qq.com](mailto:1340756235@qq.com)

**Part One: Basic Information Questionnaire for Consulting Experts**

1.This questionnaire aims to collect information about your personal background. The data will be used exclusively for statistical analysis, treated with strict confidentiality, and will not be utilized for any other purposes whatsoever. Please complete the questionnaire based on your actual situation or mark the appropriate options with a "√". If further explanations are required, please note them in the corresponding columns.If you have participated in the first round of consultation, you may only need to fill in your name.

| Name |  | | Gender | □Male  □Female | Age |  |
| --- | --- | --- | --- | --- | --- | --- |
| Highest Educational Qualification | □Doctorate  □Master’s Degree  □Bachelor’s Degree  □College Diploma  □Others：____ | | Research Field |  | Years of Professional Experience |  |
| Position | □Department Director  □Deputy Department Director  □Teaching and Research Section Director  □Deputy Teaching and Research Section Director  □Teaching and Research Section Secretary  □Ward Director  □Treatment Team Leader  □Deputy Ward Director  □Others： | | | | Professional Title | □Senior Grade  □Associate Senior Grade  □Intermediate Grade |
| Work Unit |  | | | | | |
| Contact Information |  | | | Email Address |  | |
| ID Card Number | |  | | Mobile Phone Number |  | |
| Bank Card Number | |  | | Bank Name |  | |

**Part Two: Consultation Form for Evaluation Index Determination**

Instructions for Completing the Questionnaire

**I. This section consists of 4 consultation forms, including:**

Form 1: Consultation Form for First-level Indicators

Form 2: Consultation Form for Second-level Indicators

Form 3: Consultation Form for Third-level Indicators

Form 4: Scoring Form for Judgement Basis, Influence Degree, and Familiarity with the Above Items

**II. Please rate the importance of each indicator based on your own experience and expertise.**

**Importance Rating:** Extremely Important = 5 points; Quite Important = 4 points; Moderately Important = 3 points; Less Important = 2 points; Unimportant = 1 point. Please assess the relative importance of each indicator and mark the corresponding option with a "√".

If you consider the indicator description to be inaccurate or deem the indicator should be deleted, please fill in the revised content or indicate "Delete" in the "Comments on Revision or Deletion" column. For any indicators you believe are missing and need to be added, please supplement them in the blank "Suggested Additional Items" column. Please also evaluate the importance of your revised or additional content in accordance with the aforementioned rating criteria—no blank or missing items are allowed.

**Table 1: Consultation Form for First-level indices**

**Note:** Importance Rating: Extremely Important = 5 points; Quite Important = 4 points; Moderately Important = 3 points; Less Important = 2 points; Unimportant = 1 point. If you have any suggested additional items, please fill them in the blank lines below and assess their importance in accordance with the aforementioned rating criteria.

| First-level indices | Importance Rating | | | | | Expert Opinions |
| --- | --- | --- | --- | --- | --- | --- |
| 5 | 4 | 3 | 2 | 1 | Comments on Revision or Deletion |
| 1.Professional Competence |  |  |  |  |  |  |
| 2.Teaching Competence |  |  |  |  |  |  |
| 3.Professional Ethics and Awareness |  |  |  |  |  |  |
| 4.Personal Attributes |  |  |  |  |  |  |
|  |  |  |  |  |  |  |
|  |  |  |  |  |  |  |

**Table 2: Consultation Form for Second-level indices**

**Note:** Importance Rating: Extremely Important = 5 points; Quite Important = 4 points; Moderately Important = 3 points; Less Important = 2 points; Unimportant = 1 point. If you have any suggested additional items, please fill them in the blank lines below and assess their importance in accordance with the aforementioned rating criteria.

| Second-level indices | Importance Rating | | | | | Expert Opinions |
| --- | --- | --- | --- | --- | --- | --- |
| 5 | 4 | 3 | 2 | 1 | Comments on Revision or Deletion |
| 1.1Professional Knowledge |  |  |  |  |  |  |
| 1.2Clinical Practice Skills |  |  |  |  |  |  |
|  |  |  |  |  |  |  |
|  |  |  |  |  |  |  |
| 2.1 Instructional Design and Methods |  |  |  |  |  |  |
| 2.2Teaching Supervision Capabilities |  |  |  |  |  |  |
| 2.3Instructional Assessment and Feedback |  |  |  |  |  |  |
|  |  |  |  |  |  |  |
| 3.1Professional Ethics |  |  |  |  |  |  |
| 3.2 Professional Awareness |  |  |  |  |  |  |
|  |  |  |  |  |  |  |
|  |  |  |  |  |  |  |
| 4.1Personality Traits |  |  |  |  |  |  |
| 4.2 Communication skills |  |  |  |  |  |  |
|  |  |  |  |  |  |  |
|  |  |  |  |  |  |  |

**Table 3: Consultation Form for Third-level indices**

**Note:** Importance Rating: Extremely Important = 5 points; Quite Important = 4 points; Moderately Important = 3 points; Less Important = 2 points; Unimportant = 1 point. If you have any suggested additional items, please fill them in the blank lines below, assess their importance in accordance with the aforementioned rating criteria, and provide the definitions of the Third-level indices.

| Third-level indices | Importance Rating | | | | | Expert Opinions |
| --- | --- | --- | --- | --- | --- | --- |
| 5 | 4 | 3 | 2 | 1 | Comments on Revision or Deletion |
| 1.1.1Possess fundamental medical theoretical knowledge. |  |  |  |  |  |  |
| 1.1.2Possess specialist medical knowledge and cutting-edge developments within the discipline. |  |  |  |  |  |  |
| 1.1.3Mastery of the pathogenesis, clinical manifestations, diagnosis, and prevention/treatment principles of common and prevalent diseases. |  |  |  |  |  |  |
| 1.1.4Mastery of fundamental pharmacology and rational medication principles. |  |  |  |  |  |  |
| 1.1.5Ability to diagnose and manage common and prevalent conditions relevant to the discipline. |  |  |  |  |  |  |
| 1.1.6Possess the ability to resolve complex medical issues. |  |  |  |  |  |  |
|  |  |  |  |  |  |  |
|  |  |  |  |  |  |  |
| 1.2.1Possess the ability to comprehensively, systematically and accurately collect patient histories and document medical records in accordance with established protocols. |  |  |  |  |  |  |
| 1.2.2Possess the ability to conduct physical and mental examinations in a systematic and standardised manner. |  |  |  |  |  |  |
| 1.2.3 Ability to rationally select ancillary investigations and analyse results. |  |  |  |  |  |  |
| 1.2.4Possess the ability to correctly select and proficiently apply routine fundamental diagnostic and therapeutic procedures. |  |  |  |  |  |  |
| 1.2.5Possess the ability to diagnose and manage various common and prevalent diseases relevant to the discipline. |  |  |  |  |  |  |
| 1.2.6  Possess the ability to recognise and provide basic life-saving treatment for common critical and life-threatening conditions. |  |  |  |  |  |  |
| 1.2.7 Possess the ability to use medical equipment (including smart medical devices) in a standardised manner. |  |  |  |  |  |  |
| 1.2.8 Possess the ability to perform basic clinical skills (surgical procedures). |  |  |  |  |  |  |
|  |  |  |  |  |  |  |
|  |  |  |  |  |  |  |
| 2.1.1 Possess the ability to familiarise oneself with teaching syllabuses and formulate teaching plans scientifically. |  |  |  |  |  |  |
| 2.1.2 Possess the ability to innovate teaching designs and allocate teaching time appropriately. |  |  |  |  |  |  |
| 2.1.3Possess the ability to collect and apply teaching case studies appropriately. |  |  |  |  |  |  |
| 2.1.4 Possess the ability to effectively allocate course responsibilities and cultivate trainees' capacity for independent operation. |  |  |  |  |  |  |
| 2.1.5Possess the ability to select and employ appropriate teaching methodologies (including guided, problem-based, interactive approaches). |  |  |  |  |  |  |
|  |  |  |  |  |  |  |
|  |  |  |  |  |  |  |
| 2.2.1Possess the ability to integrate hands-on operations with case-based theoretical instruction. |  |  |  |  |  |  |
| 2.2.2Possesses the ability to extrapolate knowledge and expand relevant clinical understanding. |  |  |  |  |  |  |
| 2.2.3Possess the ability to guide students' thinking and stimulate their enthusiasm for learning. |  |  |  |  |  |  |
| 2.2.4 Possess the ability to cultivate students' clinical reasoning and resolve practical clinical issues. |  |  |  |  |  |  |
| 2.2.5Possess the ability to foster students' capacity for independent learning and lifelong development of clinical skills. |  |  |  |  |  |  |
|  |  |  |  |  |  |  |
|  |  |  |  |  |  |  |
| 2.3.1Possess the ability to accurately assess student characteristics and tailor teaching accordingly. |  |  |  |  |  |  |
| 2.3.2Possesses the ability to select and apply appropriate assessment tools (e.g., formative assessment, peer assessment). |  |  |  |  |  |  |
| 2.3.3Possess the ability to evaluate students' application of knowledge and skills. |  |  |  |  |  |  |
| 2.3.4Possesses the ability to provide effective feedback and recommendations. |  |  |  |  |  |  |
| 2.3.5Possesses the ability to reflect on clinical teaching and improve teaching quality. |  |  |  |  |  |  |
|  |  |  |  |  |  |  |
|  |  |  |  |  |  |  |
| 3.1.1Consciously uphold patriotism and abide by laws, and earnestly follow the Chinese Medical Ethics Code. |  |  |  |  |  |  |
| 3.1.2Devote oneself to teaching and educating students, and fulfill the fundamental task of fostering virtue through education. |  |  |  |  |  |  |
| 3.1.3Care for students and hold a passion for practical teaching. |  |  |  |  |  |  |
| 3.1.4Adhere to a patient-centred approach and show full respect to patients. |  |  |  |  |  |  |
| 3.1.5Uphold medical ethics and protect patients' privacy. |  |  |  |  |  |  |
|  |  |  |  |  |  |  |
|  |  |  |  |  |  |  |
| 3.2.1Possess a sense of exemplary conduct. |  |  |  |  |  |  |
| 3.2.2Possess a sense of responsibility to protect and promote the health of individuals and populations. |  |  |  |  |  |  |
| 3.2.3 Possess a sense of integrity characterised by fairness and impartiality. |  |  |  |  |  |  |
| 3.2.4Possess a sense of integrity and self-discipline. |  |  |  |  |  |  |
| 3.2.5Possess a sense of teamwork. |  |  |  |  |  |  |
| 3.2.6 Possess a sense of dedication. |  |  |  |  |  |  |
|  |  |  |  |  |  |  |
|  |  |  |  |  |  |  |
| 4.1.1Possess critical thinking (applies logical reasoning and data analysis to resolve workplace issues). |  |  |  |  |  |  |
| 4.1.2Possess empathy (understands others' emotions and thinks from their perspectives). |  |  |  |  |  |  |
| 4.1.3Possess self-confidence (is confident in one's clinical and teaching work and radiates positive energy). |  |  |  |  |  |  |
| 4.1.4Possess influence (has strong personal charm and inspires those around). |  |  |  |  |  |  |
| 4.1.5Possess integrity in solitude (acts with heightened caution when unsupervised). |  |  |  |  |  |  |
| 4.1.6 Possess ambition for achievement (sets challenging work goals and strives to achieve them). |  |  |  |  |  |  |
| 4.1.7 Possess innovation capability (is adept at exploration and possesses teaching and research capabilities). |  |  |  |  |  |  |
| 4.1.8 Possess stress resilience (remains calm in the face of challenges, addresses difficulties, and overcomes setbacks). |  |  |  |  |  |  |
|  |  |  |  |  |  |  |
|  |  |  |  |  |  |  |
| 4.2.14.2.1 Possess the ability to effectively apply communication skills and appropriately handle interpersonal relationships. |  |  |  |  |  |  |
| 4.2.2Possess the ability to be adept at listening to students' needs and maintain positive teacher-student relationships. |  |  |  |  |  |  |
| 4.2.3  Possess the ability to prevent and resolve doctor-patient conflicts and establish positive doctor-patient relationships. |  |  |  |  |  |  |
| 4.2.4 Possess the ability to abide by organizational management and maintain good relationships with teaching authorities. |  |  |  |  |  |  |
|  |  |  |  |  |  |  |
|  |  |  |  |  |  |  |

**Table 4 Please select the basis for your judgements, degree of influence, and familiarity level regarding the above itemsTick "√" in the corresponding columns**

| Basis for Judgement | Degree of Influence | | | | |
| --- | --- | --- | --- | --- | --- |
| Large | Medium | | Small | |
| Theoretical Analysis |  |  | |  | |
| Practical Experience |  |  | |  | |
| References |  |  | |  | |
| Intuition |  |  | |  | |
| Your Familiarity with the Content of This Survey | | | | | |
| Familiarity Level | Highly Familiar | Relatively Familiar | Moderately Familiar | Somewhat Unfamiliar | Unfamiliar |
|  |  |  |  |  |

**Upon completion of the questionnaire, we would like to express our sincere gratitude again for your support and assistance with this research project!**

**Wish you a pleasant life and smooth work!**
